# Supplementary material
Source: publisher figshare collection journal article supplement (https://plos.figshare.com/articles/dataset/_/3904395)
Supplement: Supplementary file [file 1]

# The Socioecology of Territory Size: A comparison farmers and human foragers

Jacob Freeman<sup>\*1</sup>,

**1 Anthropology Program, Utah State University, Logan, UT 84322.**

## Supporting Information

**Table 1.** All regression models run for the explanatory variables on the territory size of agricultural societies.

|   | (Intercept) | AE    | Foraging | log(Population) | R <sup>2</sup> | df | logLik | AIC   | delta | weight |
|---|-------------|-------|----------|-----------------|----------------|----|--------|-------|-------|--------|
| 7 | -1.46       |       | 0.07     | 0.81            | 0.66           | 4  | -117.5 | 243.0 | 0.0   | 0.72   |
| 8 | -1.79       | 0.00  | 0.07     | 0.82            | 0.66           | 5  | -117.4 | 244.9 | 1.9   | 0.28   |
| 5 | 0.94        |       |          | 0.72            | 0.38           | 3  | -135.5 | 277.1 | 34.1  | 0.00   |
| 6 | 1.72        | -0.00 |          | 0.70            | 0.39           | 4  | -135.3 | 278.6 | 35.6  | 0.00   |
| 4 | 7.43        | -0.00 | 0.06     |                 | 0.20           | 4  | -143.2 | 294.5 | 51.5  | 0.00   |
| 3 | 6.00        |       | 0.06     |                 | 0.18           | 3  | -144.3 | 294.5 | 51.5  | 0.00   |
| 2 | 9.05        | -0.00 |          |                 | 0.05           | 3  | -148.7 | 303.4 | 60.4  | 0.00   |
| 1 | 7.24        |       |          |                 | 0.00           | 2  | -150.2 | 304.5 | 61.5  | 0.00   |

**Table 2.** All regression models run for the explanatory variables on the territory size off forager societies.

|    | (Intercept) | HUNTING | log(CRR) | log(TLPOP) | MCM   | R <sup>2</sup> | df | logLik | AIC    | delta | weight |
|----|-------------|---------|----------|------------|-------|----------------|----|--------|--------|-------|--------|
| 16 | 2.23        | 0.03    | -0.54    | 0.70       | -0.02 | 0.65           | 6  | -498.9 | 1009.7 | 0.0   | 1.00   |
| 8  | 2.65        | 0.04    | -0.69    | 0.75       |       | 0.64           | 5  | -507.4 | 1024.8 | 15.1  | 0.00   |
| 14 | -0.96       | 0.04    |          | 0.66       | -0.04 | 0.61           | 5  | -520.8 | 1051.6 | 41.9  | 0.00   |
| 15 | 4.58        |         | -0.67    | 0.64       | -0.04 | 0.57           | 5  | -537.5 | 1085.0 | 75.3  | 0.00   |
| 6  | -2.06       | 0.05    |          | 0.74       |       | 0.54           | 4  | -548.7 | 1105.4 | 95.7  | 0.00   |
| 7  | 6.20        |         | -1.03    | 0.72       |       | 0.50           | 4  | -561.4 | 1130.7 | 121.0 | 0.00   |
| 13 | 0.84        |         |          | 0.58       | -0.06 | 0.49           | 4  | -565.5 | 1139.1 | 129.4 | 0.00   |
| 12 | 6.20        | 0.02    | -0.38    |            | -0.04 | 0.43           | 5  | -583.8 | 1177.6 | 167.9 | 0.00   |
| 10 | 3.74        | 0.03    |          |            | -0.05 | 0.41           | 4  | -590.7 | 1189.4 | 179.7 | 0.00   |
| 11 | 7.82        |         | -0.50    |            | -0.05 | 0.37           | 4  | -599.7 | 1207.3 | 197.6 | 0.00   |
| 4  | 7.58        | 0.03    | -0.66    |            |       | 0.36           | 4  | -602.5 | 1213.0 | 203.3 | 0.00   |
| 9  | 4.72        |         |          |            | -0.07 | 0.33           | 3  | -611.1 | 1228.1 | 218.4 | 0.00   |
| 2  | 3.00        | 0.05    |          |            |       | 0.27           | 3  | -625.1 | 1256.3 | 246.6 | 0.00   |
| 3  | 10.72       |         | -0.98    |            |       | 0.25           | 3  | -631.3 | 1268.5 | 258.8 | 0.00   |
| 5  | -0.04       |         |          | 0.68       |       | 0.23           | 3  | -635.5 | 1277.0 | 267.3 | 0.00   |
| 1  | 4.55        |         |          |            |       | 0.00           | 2  | -679.1 | 1362.3 | 352.6 | 0.00   |

Note below is a spatial lag model meant to account for spatial autocorrelation among agricultural societies. Note that the population coefficient is statistically indistinguishable from the OLS models presented above.

SUMMARY OF OUTPUT: SPATIAL LAG MODEL - MAXIMUM LIKELIHOOD ESTIMATION FOR THE AGRICULTURAL SOCIETIES

Data set : AGPOP  
 Spatial Weight : AGPOP2.gwt  
 Dependent Variable : LNArea Number of Observations: 61  
 Mean dependent var : 2.62295 Number of Variables : 4  
 S.D. dependent var : 1.21687 Degrees of Freedom : 57  
 Lag coeff. (Rho) : 0.934426

R-squared : 0.591494 Log likelihood : -69.571  
 Sq. Correlation : - Akaike info criterion : 147.142  
 Sigma-square : 0.604909 Schwarz criterion : 155.585  
 S.E of regression : 0.777759

| Variable | Coefficient | Std.Error   | z-value   | Probability |
|----------|-------------|-------------|-----------|-------------|
| W_LNArea | 0.9344262   | 0.0467022   | 20.00818  | 0.00000     |
| CONSTANT | -3.446972   | 0.4227135   | -8.154394 | 0.00000     |
| LNPop    | 0.7788503   | 0.09480808  | 8.21502   | 0.00000     |
| FORAGE   | 0.03100545  | 0.004936569 | 6.280768  | 0.00000     |

REGRESSION DIAGNOSTICS  
 DIAGNOSTICS FOR HETEROSKEDASTICITY  
 RANDOM COEFFICIENTS

| TEST               | DF | VALUE  | PROB    |
|--------------------|----|--------|---------|
| Breusch-Pagan test | 2  | 7.7154 | 0.02112 |

DIAGNOSTICS FOR SPATIAL DEPENDENCE

| SPATIAL LAG DEPENDENCE FOR WEIGHT MATRIX : AGPOP2.gwt |    |        |         |
|-------------------------------------------------------|----|--------|---------|
| TEST                                                  | DF | VALUE  | PROB    |
| Likelihood Ratio Test                                 | 1  | 1.4199 | 0.23342 |

COEFFICIENTS VARIANCE MATRIX

| CONSTANT  | LNPop     | FORAGE    | W_LNArea  |
|-----------|-----------|-----------|-----------|
| 0.178687  | -0.035880 | -0.000794 | -0.005850 |
| -0.035880 | 0.008989  | 0.000074  | 0.000028  |
| -0.000794 | 0.000074  | 0.000024  | 0.000001  |
| -0.005850 | 0.000028  | 0.000001  | 0.002181  |

| OBS | LNArea | PREDICTED | RESIDUAL | PRED ERROR |
|-----|--------|-----------|----------|------------|
| 1   | 4      | 3.46688   | 0.54142  | 0.53312    |
| 2   | 2      | 3.40160   | -1.42343 | -1.40160   |
| 3   | 4      | 4.34607   | -0.35146 | -0.34607   |
| 4   | 3      | 3.32704   | -0.33214 | -0.32704   |
| 5   | 4      | 3.99065   | 0.00950  | 0.00935    |

|    |   |         |          |          |
|----|---|---------|----------|----------|
| 6  | 3 | 2.73027 | 0.27393  | 0.26973  |
| 7  | 4 | 3.98299 | 0.01728  | 0.01701  |
| 8  | 3 | 3.52407 | -0.53223 | -0.52407 |
| 9  | 4 | 3.42274 | 0.58625  | 0.57726  |
| 10 | 4 | 3.34842 | 0.66173  | 0.65158  |
| 11 | 3 | 3.25260 | -0.25654 | -0.25260 |
| 12 | 2 | 2.53104 | -0.53931 | -0.53104 |
| 13 | 4 | 3.40072 | 0.60861  | 0.59928  |
| 14 | 4 | 3.56746 | 0.43928  | 0.43254  |
| 15 | 3 | 3.70414 | -0.71510 | -0.70414 |
| 16 | 3 | 3.33493 | -0.34014 | -0.33493 |
| 17 | 0 | 1.20767 | -1.22647 | -1.20767 |
| 18 | 3 | 2.67771 | 0.32731  | 0.32229  |
| 19 | 2 | 1.54293 | 0.46419  | 0.45707  |
| 20 | 3 | 2.84088 | 0.16160  | 0.15912  |
| 21 | 3 | 3.24794 | -0.25180 | -0.24794 |
| 22 | 1 | 0.95473 | 0.04598  | 0.04527  |
| 23 | 3 | 3.25653 | -0.26052 | -0.25653 |
| 24 | 3 | 3.03228 | -0.03278 | -0.03228 |
| 25 | 3 | 3.19511 | -0.19814 | -0.19511 |
| 26 | 2 | 2.88992 | -0.90378 | -0.88992 |
| 27 | 4 | 3.45438 | 0.55412  | 0.54562  |
| 28 | 1 | 1.94322 | -0.95791 | -0.94322 |
| 29 | 2 | 2.07942 | -0.08066 | -0.07942 |
| 30 | 3 | 1.60444 | 1.41730  | 1.39556  |
| 31 | 4 | 3.57958 | 0.42697  | 0.42042  |
| 32 | 3 | 3.48740 | -0.49499 | -0.48740 |
| 33 | 4 | 3.68702 | 0.31785  | 0.31298  |
| 34 | 3 | 3.08612 | -0.08747 | -0.08612 |
| 35 | 1 | 1.23380 | -0.23744 | -0.23380 |
| 36 | 2 | 3.09433 | -1.11137 | -1.09433 |
| 37 | 4 | 2.30174 | 1.72470  | 1.69826  |
| 38 | 0 | 1.43375 | -1.45608 | -1.43375 |
| 39 | 4 | 3.02540 | 0.98978  | 0.97460  |
| 40 | 4 | 4.32835 | -0.33347 | -0.32835 |
| 41 | 3 | 1.75300 | 1.26642  | 1.24700  |
| 42 | 2 | 1.63441 | 0.37128  | 0.36559  |
| 43 | 1 | 1.01538 | -0.01562 | -0.01538 |
| 44 | 0 | 1.04356 | -1.05981 | -1.04356 |
| 45 | 4 | 2.36680 | 1.65864  | 1.63320  |
| 46 | 0 | 1.07499 | -1.09173 | -1.07499 |
| 47 | 2 | 2.56056 | -0.56929 | -0.56056 |
| 48 | 3 | 2.87807 | 0.12382  | 0.12193  |
| 49 | 3 | 2.08075 | 0.93356  | 0.91925  |
| 50 | 3 | 2.56336 | 0.44344  | 0.43664  |
| 51 | 3 | 2.54815 | 0.45889  | 0.45185  |
| 52 | 2 | 2.43240 | -0.43914 | -0.43240 |
| 53 | 3 | 2.34228 | 0.66796  | 0.65772  |
| 54 | 1 | 0.85922 | 0.14297  | 0.14078  |
| 55 | 3 | 3.52543 | -0.53361 | -0.52543 |
| 56 | 3 | 2.01380 | 1.00156  | 0.98620  |
| 57 | 3 | 3.30607 | -0.31084 | -0.30607 |

|                           |   |         |          |          |
|---------------------------|---|---------|----------|----------|
| 58                        | 0 | 1.56480 | -1.58917 | -1.56480 |
| 59                        | 0 | 1.22471 | -1.24378 | -1.22471 |
| 60                        | 3 | 1.47811 | 1.54559  | 1.52189  |
| 61                        | 2 | 1.21787 | 0.79431  | 0.78213  |
| ===== END OF REPORT ===== |   |         |          |          |
